# Supplementary material
Source: Springer Nature journal article supplement (https://www.springermedizin.de/resource/supplementary/13256_2010_1759_MOESM1_ESM.pdf/9648414)

DATE: 6-26-  
PINA TOMAS  
DOB: 3- 1-11  
Chest MR

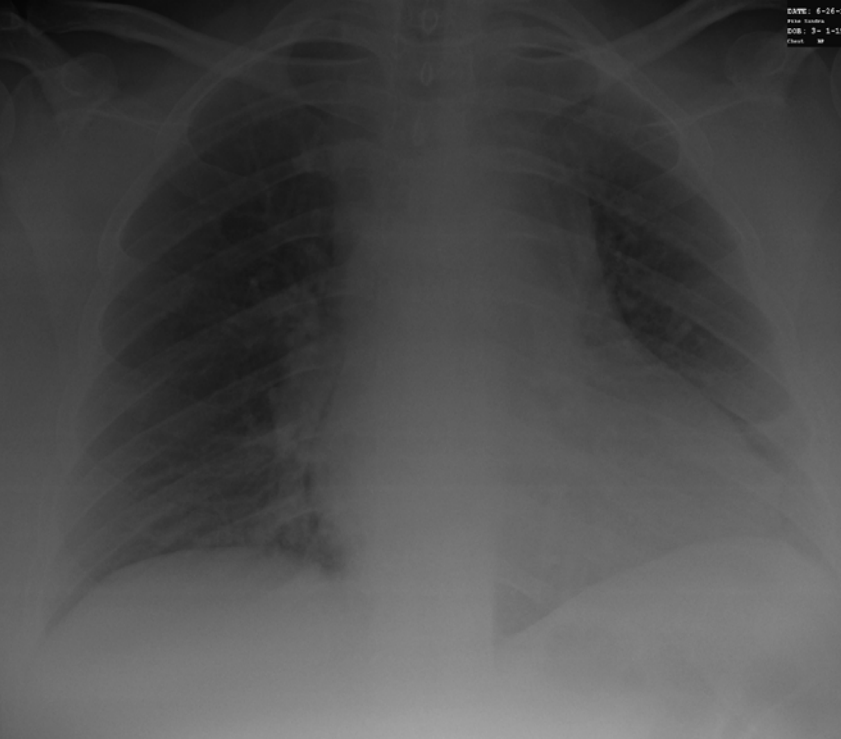

Supplement: MOESM1 [file 9648414]
